# Supplementary material for: Dual polarity MALDI imaging mass spectrometry on the same pixel points reveals spatial lipid localizations at high-spatial resolutions in rat small intestine
Source: PubMed Central journal article supplement — Anal Methods. 2018 May 3;10(21):2428–35. doi: 10.1039/c8ay00645h (PMC5985652; doi:10.1039/c8ay00645h), 2018-05-03
Supplement: AY-010-C8AY00645H-s001.pdf [file AY-010-C8AY00645H-s001.pdf]

# Dual Polarity MALDI Imaging Mass Spectrometry Reveals Spatial Lipid Localizations at High-Spatial Resolutions in Rat Small Intestine

*Ibrahim Kaya*<sup>1,2</sup>, *Eva Jennische*<sup>3</sup>, *Stefan Lange*<sup>3</sup> and *Per Malmberg*<sup>2,4\*</sup>

<sup>1</sup> Department of Chemistry and Molecular Biology, University of Gothenburg 412 96, Sweden

<sup>2</sup> The Gothenburg Imaging Mass Spectrometry (Go:IMS) platform, University of Gothenburg and Chalmers University of Technology, Gothenburg 412 96, Sweden

<sup>3</sup> Institute of Biomedicine, Gothenburg 413 90, Sweden

<sup>4</sup> Department of Chemistry and Chemical Engineering, Chalmers University of Technology, Gothenburg 412 96, Sweden

## **\*Corresponding Author**

Per Malmberg, PhD

Department of Chemistry and Chemical Engineering, Chalmers University of Technology,  
Gothenburg 412 96, Sweden

[malmper@chalmers.se](mailto:malmper@chalmers.se), tel: +46317728321

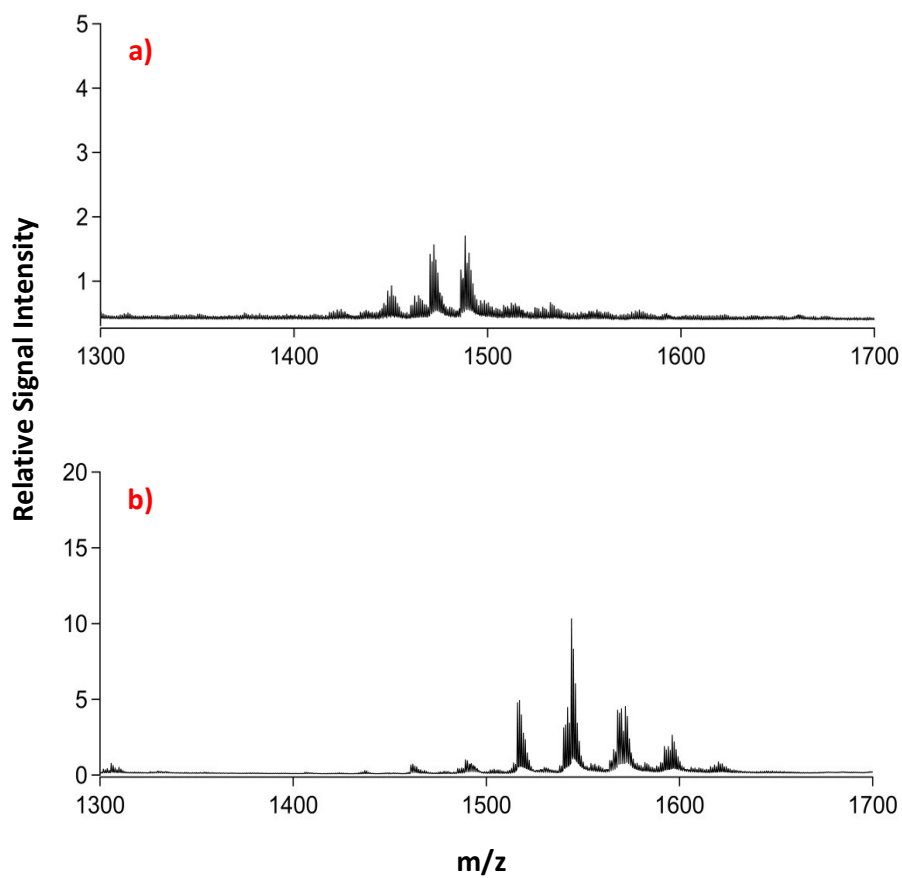

**Supporting Information Figure S-1:** a) Cardiolipins observed in negative ion mode (1300-1700Da) b) phospholipid dimers<sup>1</sup> observed in positive ion mode (1300-1700Da).

(1) Jackson, S. N.; Wang, H.-Y. J.; Woods, A. S.; Ugarov, M.; Egan, T.; Schultz, J. A. *Journal of the American Society for Mass Spectrometry* **2005**, *16*, 133-138.
